# Supplementary material for: Sequential Delivery of Cyclopeptide RA-V and Doxorubicin for Combination Therapy on Resistant Tumor and In Situ Monitoring of Cytochrome c Release
Source: PubMed Central journal article supplement — Theranostics. 2017 Aug 23;7(15):3781–93. doi: 10.7150/thno.20892 (PMC5667348; doi:10.7150/thno.20892), 2017-08-23
Supplement: thnov07p3781s1.pdf [file thnov07p3781s1.pdf]

## Supplementary Material

# Sequential Delivery of Cyclopeptide RA-V and Doxorubicin for Combination Therapy on Resistant Tumor and *In Situ* Monitoring of Cytochrome c Release

Huachao Chen,<sup>1\*</sup> Yurong Wang,<sup>1\*</sup> Yongrong Yao,<sup>1</sup> Shenglin Qiao,<sup>2</sup> Hao Wang,<sup>2</sup> Ninghua

Tan<sup>1,✉</sup> □

<sup>1</sup>State Key Laboratory of Natural Medicines, Jiangsu Key Laboratory of TCM Evaluation and Translational Research, School of Traditional Chinese Pharmacy, China Pharmaceutical University, Nanjing 211198, China.

<sup>2</sup>CAS Key Laboratory for Biological Effects of Nanomaterials and Nanosafety, National Center for Nanoscience and Technology, Beijing, 100190, China.

\*Contributed equally to this work.

✉Corresponding author, Ninghua Tan, Email: nhtan@cpu.edu.cn

## Supplementary figures

- Figure S1.** (A) TEM micrograph of Dox/MPP-DGL. Scale bar: 100 nm. (B) Size distribution of the Dox/MPP-DGL characterized by DLS at 25 °C. (C) TEM micrograph of DGLipo NPs. Scale bar: 100 nm. (D) Size distribution of the DGLipo NPs characterized by DLS at 25 °C.
- Figure S2.** TEM micrograph of degraded DGLipo NPs in acidic environment. Scale bar: 100 nm.
- Figure S3.** Long-term-stability study of Dox/MPP-DGL in RPMI 1640 or DMEM with 10% FBS, and DGLipo NPs in RPMI 1640 or DMEM with 10% FBS.

4. **Figure S4.** (A) Fluorescence spectra of Dox/Duplex with increasing concentrations of Cyt c (from bottom to top: 0, 1, 2, 3, 4, 5, 6, 7, 8, 9, 10  $\mu\text{M}$ ) after 5 min of incubation in the HEPES buffer (5 mM). (B) Fluorescence intensity at 595 nm of Dox/Duplex toward various analytes: Cyt c (10  $\mu\text{M}$ ); other analytes (10  $\mu\text{M}$  and 100  $\mu\text{M}$ ). Data are means  $\pm$  SD ( $n = 3$ ), \*\*\* $P < 0.001$  compared to other groups using a one-way ANOVA.
5. **Figure S5.** Real-time confocal fluorescence imaging of HeLa cells incubated with DGLipo NPs at 37  $^{\circ}\text{C}$  for 2 h, and further incubated with fresh culture medium for additional 4 h. Scale bars: 20  $\mu\text{m}$ .
6. **Figure S6.** Co-localization images of DGLipo NPs in HeLa cells. HeLa cells incubated with DGLipo NPs at 37  $^{\circ}\text{C}$  for 2 h, and further incubated with fresh culture medium for additional 1 h, and then incubated with 100 nM LysoTracker Blue, ER Tracker Blue, Hoechst 33342 and MitoTracker Blue 10 min. Scale bars: 20  $\mu\text{m}$ .
7. **Figure S7.** Co-localization images of DGLipo NPs in HeLa cells. HeLa cells incubated with DGLipo NPs at 37  $^{\circ}\text{C}$  for 2 h, and further incubated with fresh culture medium for additional 4 h, and then incubated with 100 nM Hoechst 33342 for 10 min. Scale bars: 20  $\mu\text{m}$ .
8. **Figure S8.** Confocal fluorescence images of apoptosis by the JC-1 assay in HeLa cells treated with 50  $\mu\text{g mL}^{-1}$  DGLipo NPs or 50  $\mu\text{g mL}^{-1}$  DGLipo NPs (no RA-V). Scale bars: 20  $\mu\text{m}$ . In healthy cells with high mitochondrial membrane potential, JC-1 spontaneously forms complexes known as J-aggregates with intense red fluorescence. In apoptotic or unhealthy cells with low mitochondrial membrane potential, JC-1 remains in the monomeric form, which shows only green fluorescence. The fluorescence of green channel was excited at 488 nm and the emission was collected between 510-545 nm. The fluorescence of red channel was excited at 543 nm and the emission was collected between 575-630 nm.
9. **Figure S9.** Confocal images of immunostaining show the release of Cyt c in the cells. HeLa cells incubated with 50  $\mu\text{g mL}^{-1}$  DGLipo NPs for 2 h, and further incubated with fresh culture medium for additional (A) 1 h, (B) 1.5 h and (C) 2 h. And then fixed and stained with Cyt c antibody and FITC-conjugated secondary antibody. Cells were observed by confocal microscopy. Scale bars: 20  $\mu\text{m}$ .
10. **Figure S10.** Real-time fluorescence imaging of Cyt c release in HeLa cells incubated with 50  $\mu\text{g mL}^{-1}$  DGLipo NPs for 2 h, and further incubated with fresh culture medium for additional 1 h. The mitochondria were stained by MitoTracker Blue. Scale bars: 20  $\mu\text{m}$ .
11. **Figure S11.** Real-time fluorescence imaging of HeLa cells incubated with 50  $\mu\text{g mL}^{-1}$  cDGLipo NPs for 2 h, and further incubated with fresh culture medium for additional 2 h. Scale bars: 20  $\mu\text{m}$ .
12. **Figure S12.** MTT assay of HeLa cells and HeLa/MDR cells in the presence of different concentrations of free Dox. The half-maximal inhibitory concentration ( $\text{IC}_{50}$ ) of Dox on HeLa cells and HeLa/MDR cells were 1.8  $\mu\text{M}$  and 10  $\mu\text{M}$ , respectively.
13. **Figure S13.** Change of relative tumor volume ( $V/V_0$ ) upon treatments with different concentrations of DGLipo NPs on HeLa tumor-bearing mice. Data are means  $\pm$  SD ( $n = 6$ ), \*\* $P < 0.01$ , \*\*\* $P < 0.001$ .
14. **Figure S14.** Change of relative tumor volume ( $V/V_0$ ) upon different treatments on HeLa/MDR tumor-bearing mice. Data are means  $\pm$  SD ( $n = 6$ ), \*\*\* $P < 0.001$  compared to other groups using a one-way ANOVA.

## Supplementary video

**Video S1.** Real-time fluorescence imaging of Cyt c release in HeLa cells incubated with  $50 \mu\text{g mL}^{-1}$  DGLipo NPs for 2 h, and further incubated with fresh culture medium for additional 1 h.

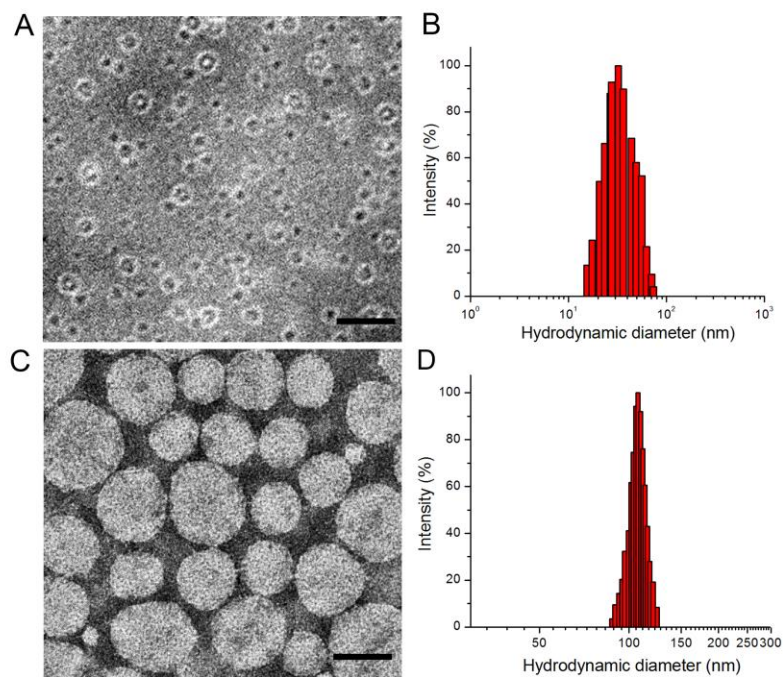

**Figure S1.** (A) TEM micrograph of Dox/MPP-DGL. Scale bar: 100 nm. (B) Size distribution of the Dox/MPP-DGL characterized by DLS at 25 °C. (C) TEM micrograph of DGLipo NPs. Scale bar: 100 nm. (D) Size distribution of the DGLipo NPs characterized by DLS at 25 °C.

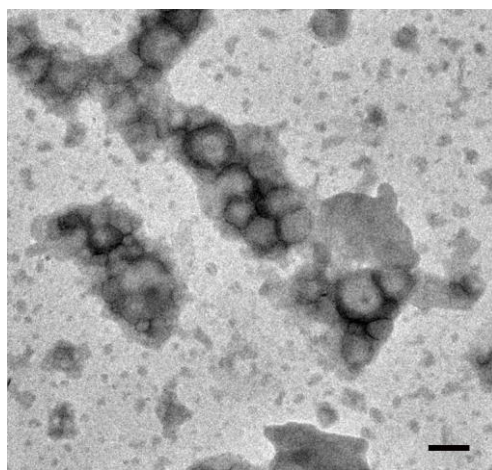

**Figure S2.** TEM micrograph of degraded DGLipo NPs in acidic environment. Scale bar: 100 nm.

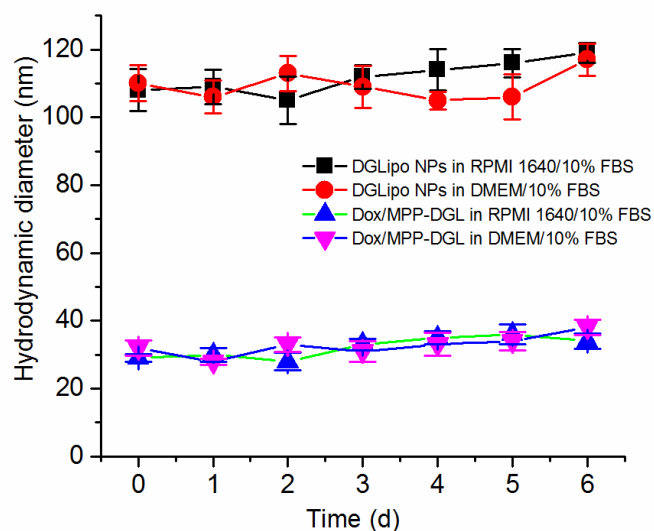

**Figure S3.** Long-term-stability study of Dox/MPP-DGL in RPMI 1640 or DMEM with 10% FBS, and DGLipo NPs in RPMI 1640 or DMEM with 10% FBS.

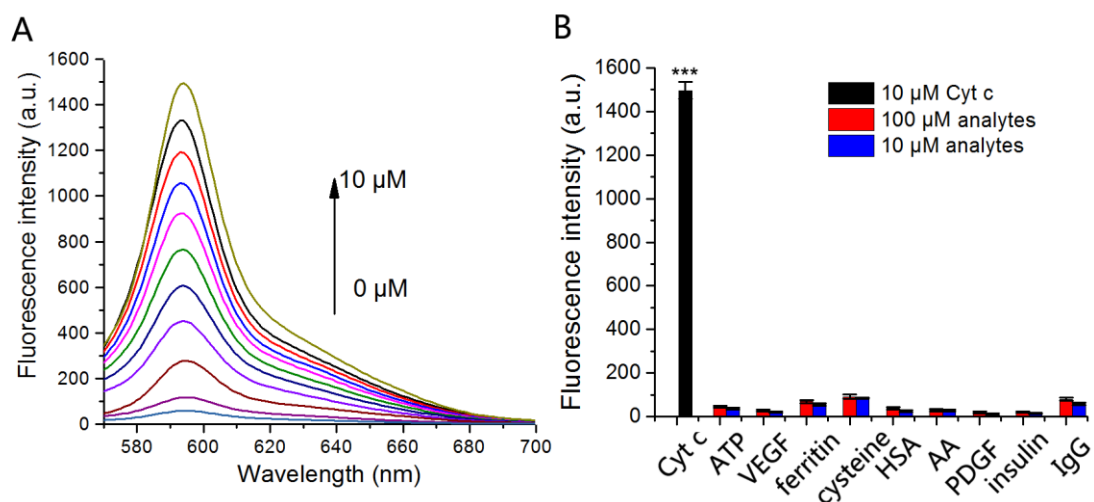

**Figure S4.** (A) Fluorescence spectra of Dox/Duplex with increasing concentrations of Cyt c (from bottom to top: 0, 1, 2, 3, 4, 5, 6, 7, 8, 9, 10  $\mu\text{M}$ ) after 5 min of incubation in the HEPES buffer (5 mM). (B) Fluorescence intensity at 595 nm of Dox/Duplex toward various analytes: Cyt c (10  $\mu\text{M}$ ); other analytes (10  $\mu\text{M}$  and 100  $\mu\text{M}$ ). Data are means  $\pm$  SD ( $n = 3$ ), \*\*\* $P < 0.001$  compared to other groups using a one-way ANOVA.

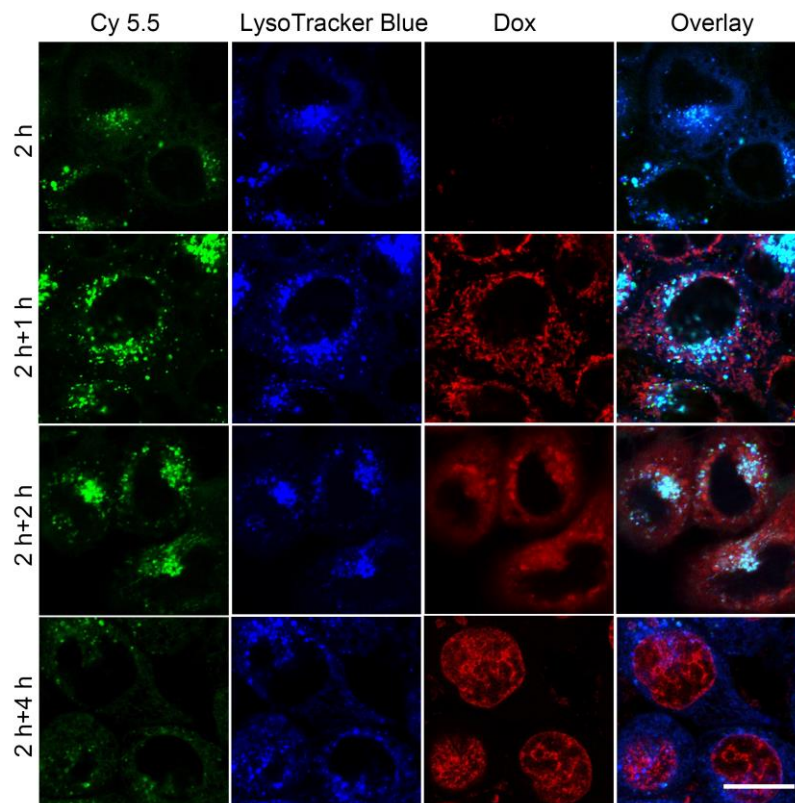

**Figure S5.** Real-time confocal fluorescence imaging of HeLa cells incubated with DGLipo NPs at 37 °C for 2 h, and further incubated with fresh culture medium for additional 4 h. Scale bars: 20  $\mu\text{m}$ .

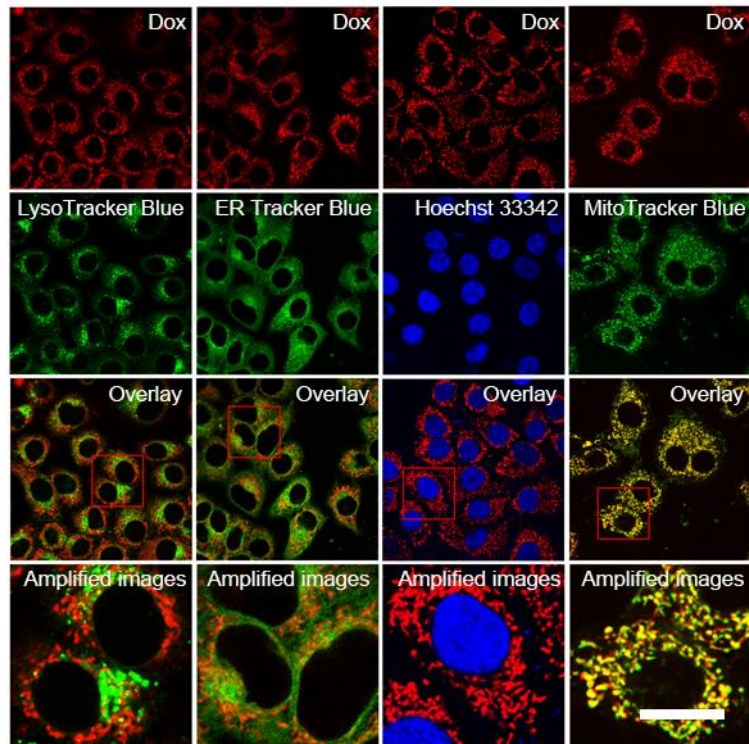

**Figure S6.** Co-localization images of DGLipo NPs in HeLa cells. HeLa cells incubated with DGLipo NPs at 37 °C for 2 h, and further incubated with fresh culture medium for additional 1 h, and then incubated with 100 nM LysoTracker Blue, ER Tracker Blue, Hoechst 33342 and MitoTracker Blue 10 min. Scale bars: 20  $\mu$ m.

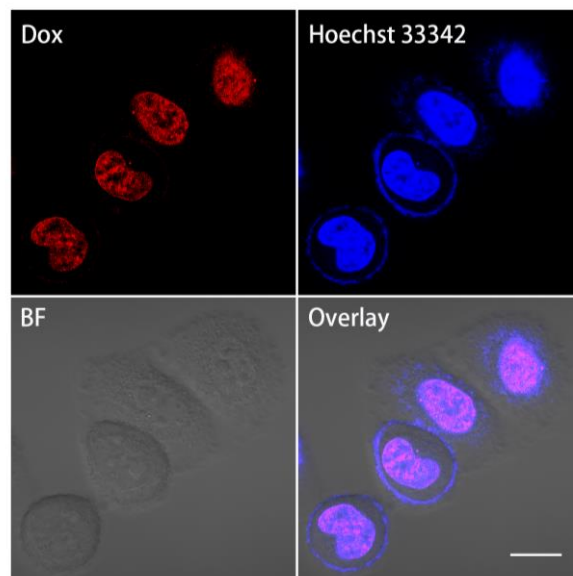

**Figure S7.** Co-localization images of DGLipo NPs in HeLa cells. HeLa cells incubated with DGLipo NPs at 37 °C for 2 h, and further incubated with fresh culture medium for additional 4 h, and then incubated with 100 nM Hoechst 33342 for 10 min. Scale bars: 20  $\mu$ m.



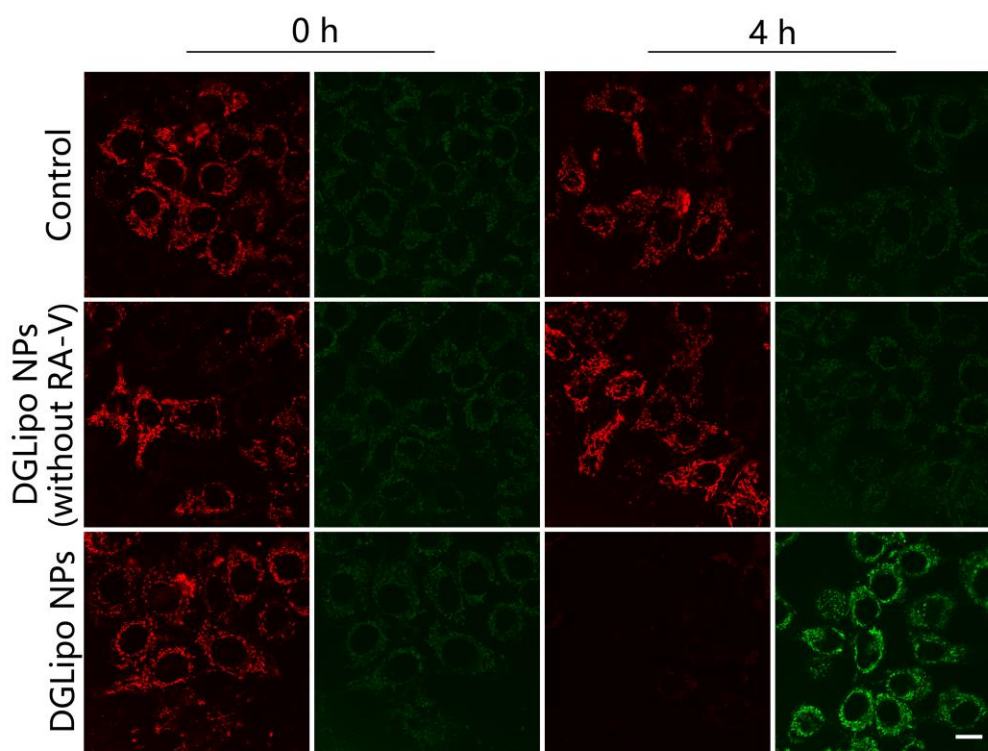

**Figure S8.** Confocal fluorescence images of apoptosis by the JC-1 assay in HeLa cells treated with  $50 \mu\text{g mL}^{-1}$  DGLipo NPs or  $50 \mu\text{g mL}^{-1}$  DGLipo NPs (no RA-V). Scale bars:  $20 \mu\text{m}$ . In healthy cells with high mitochondrial membrane potential, JC-1 spontaneously forms complexes known as J-aggregates with intense red fluorescence. In apoptotic or unhealthy cells with low mitochondrial membrane potential, JC-1 remains in the monomeric form, which shows only green fluorescence. The fluorescence of green channel was excited at 488 nm and the emission was collected between 510-545 nm. The fluorescence of red channel was excited at 543 nm and the emission was collected between 575-630 nm.

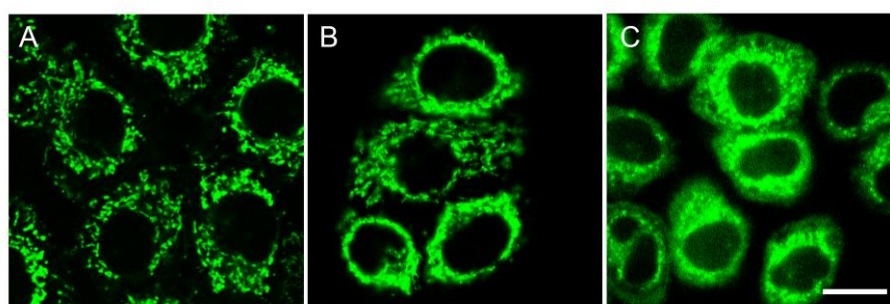

**Figure S9.** Confocal images of immunostaining show the release of Cyt c in the cells. HeLa cells incubated with  $50 \mu\text{g mL}^{-1}$  DGLipo NPs for 2 h, and further incubated with fresh culture medium for additional (A) 1 h, (B) 1.5 h and (C) 2 h. And then fixed and stained with Cyt c antibody and FITC-conjugated secondary antibody. Cells were observed by confocal microscopy. Scale bars:  $20 \mu\text{m}$ .



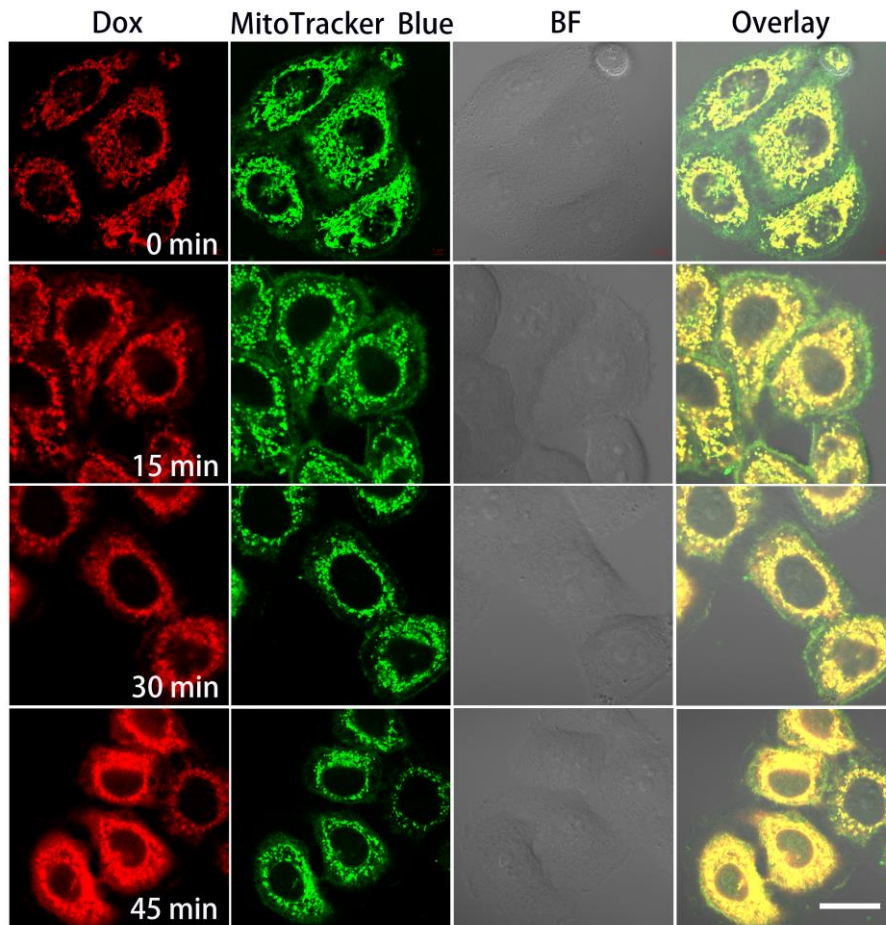

**Figure S10.** Real-time fluorescence imaging of Cyt c release in HeLa cells incubated with  $50 \mu\text{g mL}^{-1}$  DGLipo NPs for 2 h, and further incubated with fresh culture medium for additional 1 h. The mitochondria were stained by MitoTracker Blue. Scale bars:  $20 \mu\text{m}$ .

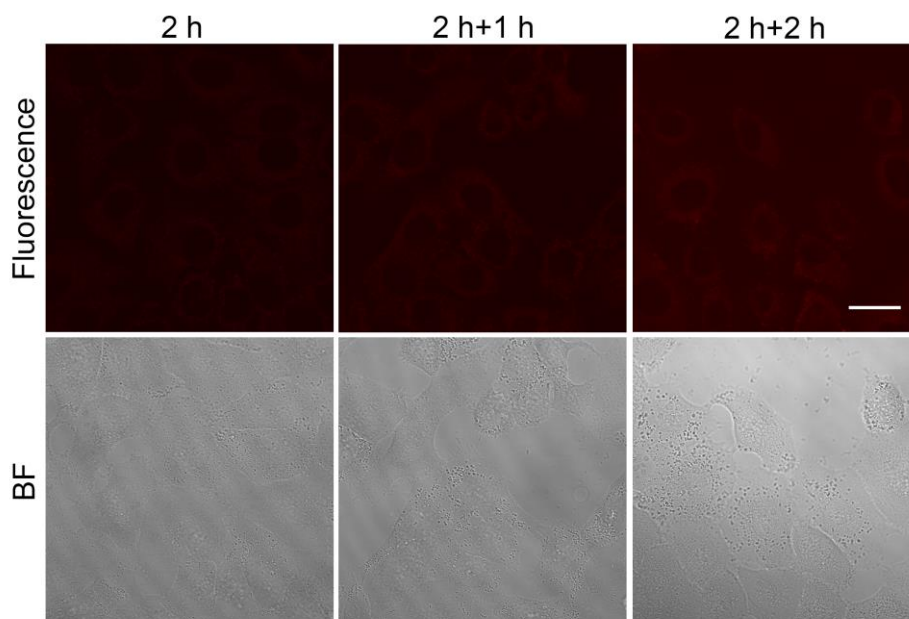

**Figure S11.** Real-time fluorescence imaging of HeLa cells incubated with  $50 \mu\text{g mL}^{-1}$  cDGLipo NPs for 2 h, and further incubated with fresh culture medium for additional 2 h. Scale bars: 20  $\mu\text{m}$ .

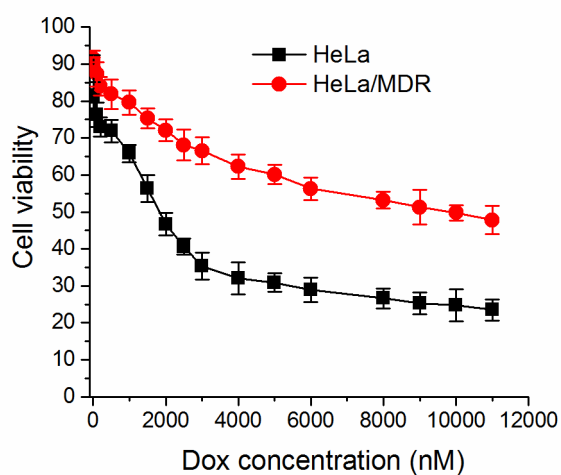

**Figure S12.** MTT assay of HeLa cells and HeLa/MDR cells in the presence of different concentrations of free Dox. The half-maximal inhibitory concentration (IC<sub>50</sub>) of Dox on HeLa cells and HeLa/MDR cells were 1.8  $\mu\text{M}$  and 10  $\mu\text{M}$ , respectively.

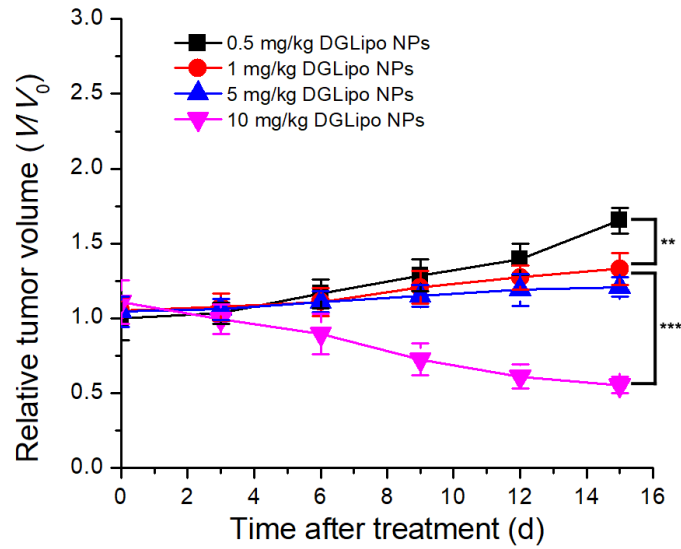

**Figure S13.** Change of relative tumor volume ( $V/V_0$ ) upon treatments with different concentrations of DGLipo NPs on HeLa tumor-bearing mice. Data are means  $\pm$  SD ( $n = 6$ ), \*\* $P < 0.01$ , \*\*\* $P < 0.001$ .

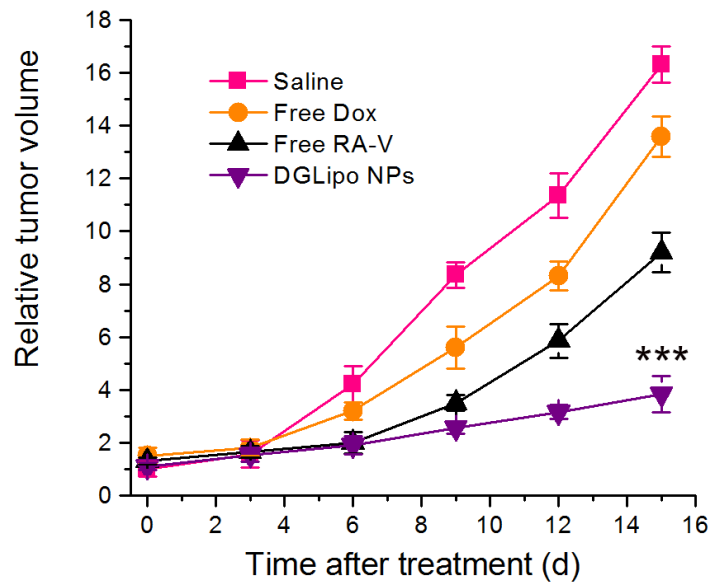

**Figure S14.** Change of relative tumor volume ( $V/V_0$ ) upon different treatments on HeLa/MDR tumor-bearing mice. Data are means  $\pm$  SD ( $n = 6$ ), \*\*\* $P < 0.001$  compared to other groups using a one-way ANOVA.
